# Supplementary material for: The oxidative debt of fasting: evidence for short to medium-term costs of advanced fasting in adult king penguins
Source: Oxford University Press journal article supplement (doi:10.1242/jeb.145250), 2016-01-01
Supplement: jeb145250supp.pdf [file jeb145250supp.pdf]

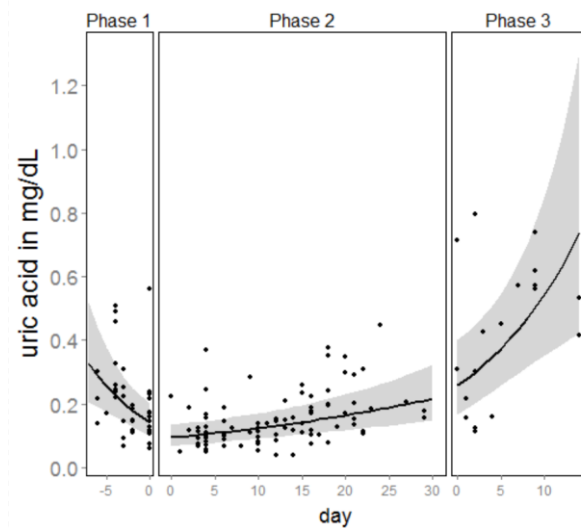

Fig. S1. Plasmatic Uric Acid dynamic in mg/dL during prolonged fasting. The exact day of transition between each phase (I; II; III) was determined using segmented regression models ('segmented' package in R; Muggeo, 2008) between the specific uric acid level and the time of fast.
